# Supplementary material for: Biomimetic Synthesis of Silver Nanoparticles Using Endosymbiotic Bacterium InhabitingEuphorbia hirtaL. and Their Bactericidal Potential
Source: Hindawi journal article supplement (doi:10.1155/2016/9020239), 2016-01-01

# Graphical Abstract

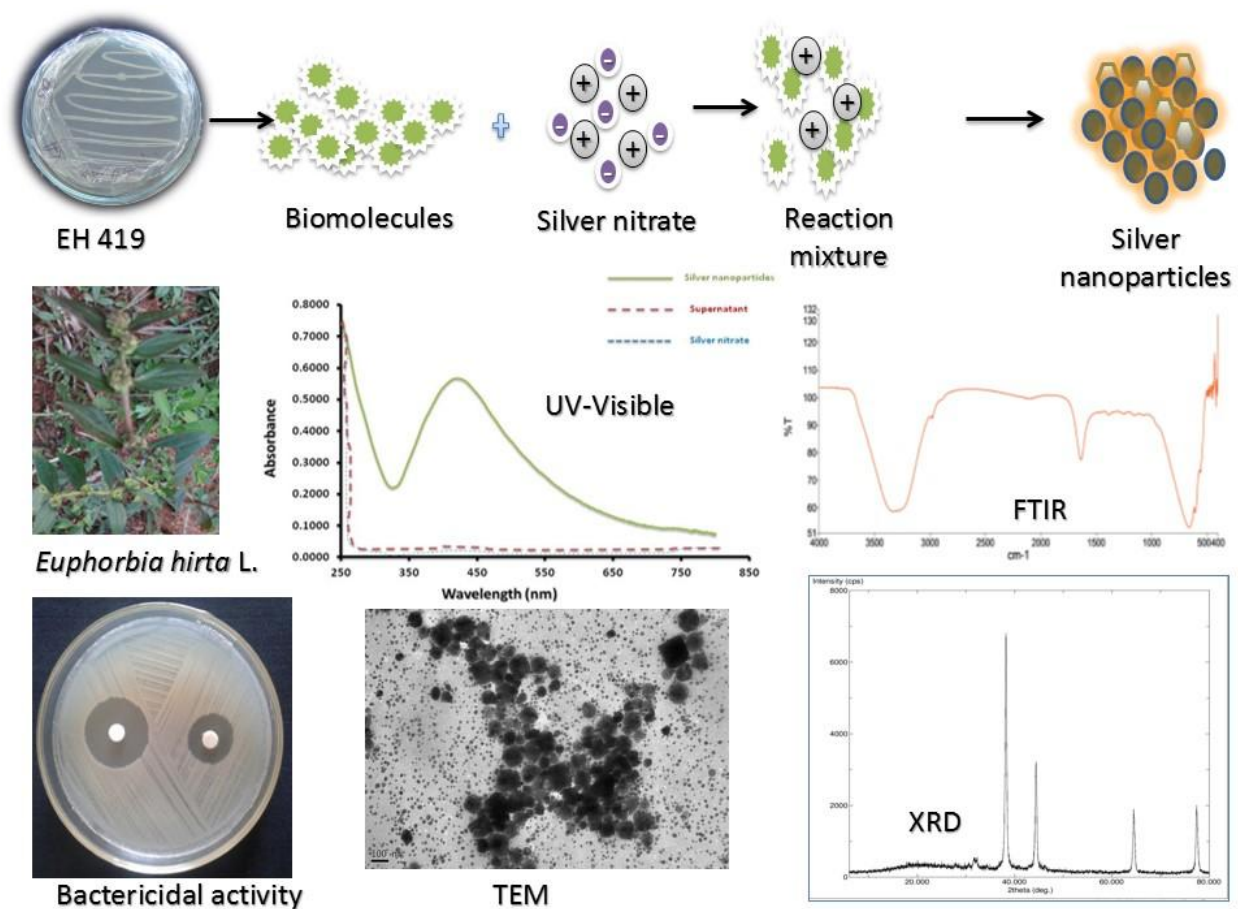

Supplement: f1 [file 9020239.f1.pdf]
